# Supplementary material for: Nanowires of α- and β-Bi2O3: phase-selective synthesis and application in photocatalysis
Source: Royal Society of Chemistry journal article supplement (doi:10.1039/c0ce00508h), 2010-12-09
Supplement: c0ce00508h.pdf [file c0ce00508h.pdf]

# Nanowires of $\alpha$ - and $\beta$ - $\text{Bi}_2\text{O}_3$ : Phase-Selective Synthesis and Application in Photocatalysis

Yongfu Qiu,<sup>ab</sup> Minlin Yang,<sup>a</sup> Hongbo Fan,<sup>a</sup> Yuanzhi Zuo,<sup>a</sup> Youyuan Shao,<sup>a</sup> Yongjun Xu,<sup>a</sup> Xiaoxi Yang,<sup>a</sup> Shihe Yang<sup>\*b</sup>

## Supporting Information

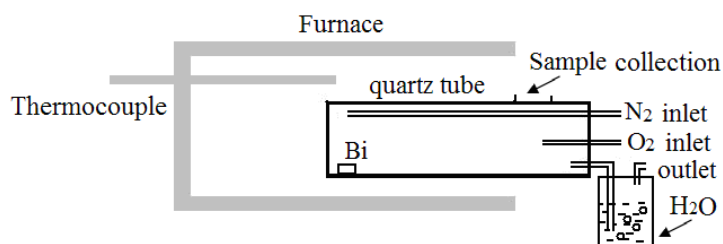

**Figure S1** Schematic diagram of the setup for the  $\text{Bi}_2\text{O}_3$  nanowires synthesis.

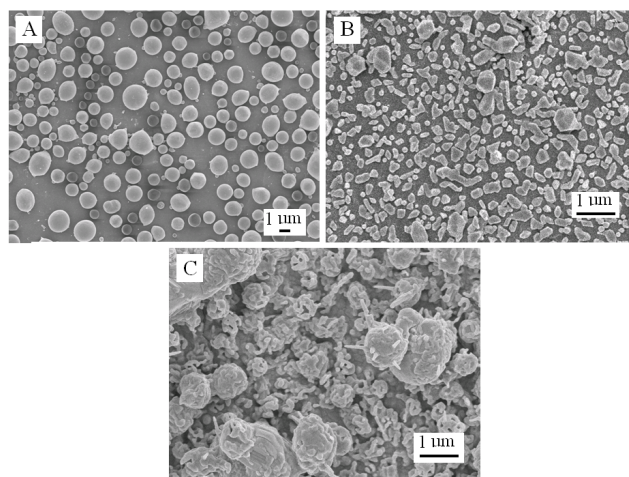

**Figure S2** SEM images of the samples synthesized with different oxygen concentrations with continuous  $\text{O}_2$  flow: (A) 0.1%; (B) 1%; (C) 10%. The Bi evaporation temperature is all 800  $^\circ\text{C}$ .
